# Supplementary material
Source: PubMed Central journal article supplement (PMC2955514)
Supplement: NIHMS241147-supplement-01.pdf [file NIHMS241147-supplement-01.pdf]

## SUPPLEMENTARY DATA

**TABLE 1. Mean EC<sub>50</sub>/IC<sub>50</sub> values and Hill coefficients for ligand action at different nAChR subtypes.**

<sup>86</sup>Rb<sup>+</sup> efflux assays were conducted as described in Methods and in the legends to Figs. 2-5 for cells expressing the indicated nAChR subtypes and for the ligands listed in column 1. **Agonism:** Results for agonism were fit to the logistic equation to determine mean nanomolar EC<sub>50</sub> values (upper values; see SE for log molar EC<sub>50</sub> values in TABLE 1), mean nanomolar IC<sub>50</sub> values (upper values in parentheses; see SE for log molar IC<sub>50</sub> values in TABLE 1) for drugs also displaying self-inhibition) and Hill coefficients (± SE) for agonism (middle values) or self inhibition when present (lower values in parentheses). **Inactivation:** Results for inactivation of responses mediated by a standard agonist were fit to the logistic equation to determine mean nanomolar IC<sub>50</sub> values (upper values; see SE for log molar values in TABLE 1) and Hill coefficients (± SE; lower values).

| Drug | Agonism                                                                          |                                               |                                             |                                                | Inactivation                         |                      |                      |                        |
|------|----------------------------------------------------------------------------------|-----------------------------------------------|---------------------------------------------|------------------------------------------------|--------------------------------------|----------------------|----------------------|------------------------|
|      | nM EC <sub>50</sub> value (nM IC <sub>50</sub> self inhibition values)           |                                               |                                             |                                                | nM IC <sub>50</sub> value            |                      |                      |                        |
|      | Hill coefficient for agonism ± SE<br>(Hill coefficient for self inhibition ± SE) |                                               |                                             |                                                | Hill coefficient for antagonism ± SE |                      |                      |                        |
|      | α4β2                                                                             | α4β4                                          | α3β4*                                       | α1*                                            | α4β2                                 | α4β4                 | α3β4*                | α1*                    |
|      | 5.8                                                                              | 25 (25,000)                                   | 340                                         | 2200                                           | 4.8                                  | 29                   | 600                  | 2500                   |
| 7    | 2.38 ± 0.31                                                                      | 1.47 ± 0.39<br>(-1.31 ± 0.90)                 | 1.28 ± 0.22                                 | 1.91 ± 0.31                                    | -2.15 ± 0.48                         | -1.56 ± 0.04         | -0.91 ± 0.28         | -1.22 ± 0.14           |
| 16   | 9.8 (8900)<br>2.24 ± 0.24<br>(-2.04 ± 1.99)                                      | 40 (72,000)<br>1.74 ± 0.49<br>(-0.45 ± 0.63)  | 810 (7100)<br>2.47 ± 0.51<br>(-3.34 ± 0.79) | 1000 (13,000)<br>1.88 ± 0.15<br>(-2.50 ± 0.50) | 8.9<br>-1.18 ± 0.14                  | 32<br>-1.69 ± 0.11   | 1300<br>-1.40 ± 0.31 | 870<br>-1.40 ± 0.15    |
| 18   | 30 (5500)<br>2.36 ± 0.48<br>(-1.98 ± 0.41)                                       | 150 (3500)<br>1.70 ± 0.13<br>(-1.55 ± 0.13)   | >>10,000<br>-                               | 490 (3300)<br>4.97 ± 2.24<br>(-3.17 ± 1.33)    | 180<br>-0.47 ± 0.05                  | 120<br>-1.66 ± 0.23  | 620<br>-1.23 ± 0.27  | 370<br>-1.49 ± 0.21    |
| 13   | 76<br>2.25 ± 0.08                                                                | 690 (45,000)<br>2.44 ± 0.69<br>(-2.53 ± 2.67) | >>10,000<br>-                               | >>10,000<br>-                                  | 690<br>-0.59 ± 0.15                  | 1000<br>-1.13 ± 0.10 | 1100<br>-1.40 ± 0.39 | 2800<br>-0.93 ± 0.17   |
| 20   | 74 (7100)<br>2.34 ± 0.46<br>(-1.56 ± 0.39)                                       | 330 (4800)<br>1.56 ± 0.17<br>(-1.60 ± 0.23)   | >>10,000<br>-                               | >>10,000<br>-                                  | 580 (>10,000)<br>-0.56 ± 0.04        | 220<br>-1.68 ± 0.33  | 790<br>-2.10 ± 0.59  | 760<br>-1.53 ± 0.20    |
| 10   | 87<br>2.07 ± 0.08                                                                | 680 (7100)<br>1.27 ± 0.08<br>(-1.67 ± 0.18)   | >>10,000<br>-                               | >>10,000<br>-                                  | 650<br>-0.66 ± 0.10                  | 390<br>-1.33 ± 0.17  | 890<br>-1.74 ± 0.26  | 1800<br>-1.54 ± 0.11   |
| 11   | 110<br>2.38 ± 1.40                                                               | 1900<br>1.00 ± 0.27                           | >>10,000<br>-                               | >>10,000<br>-                                  | 5500<br>-0.63 ± 0.04                 | 1200<br>-1.25 ± 0.19 | 4100<br>-1.55 ± 0.36 | 15,000<br>-1.33 ± 0.35 |
| 1    | 300<br>1.00 ± 0.10                                                               | ND<br>-                                       | ND<br>-                                     | ND<br>-                                        | 430<br>-0.81 ± 0.09                  | ND<br>-              | ND<br>-              | ND<br>-                |
| 12   | 380<br>2.87 ± 2.01                                                               | 320 (3200)<br>1.46 ± 0.24<br>(-1.19 ± 0.57)   | >>10,000<br>-                               | >>10,000<br>-                                  | 4600<br>-1.65 ± 0.13                 | 410<br>-1.44 ± 0.20  | 830<br>-1.80 ± 0.24  | 850<br>-1.82 ± 0.20    |
| 26   | >>10,000<br>-                                                                    | >>10,000<br>-                                 | >>10,000<br>-                               | >>10,000<br>-                                  | >>10,000<br>-                        | ND<br>-              | >>10,000<br>-        | >>10,000<br>-          |
